# Supplementary material
Source: PubMed Central journal article supplement (PMC4272719)
Supplement: AEM.02972-14_zam999105914so1.pdf [file AEM.02972-14_zam999105914so1.pdf]

Fig. S1

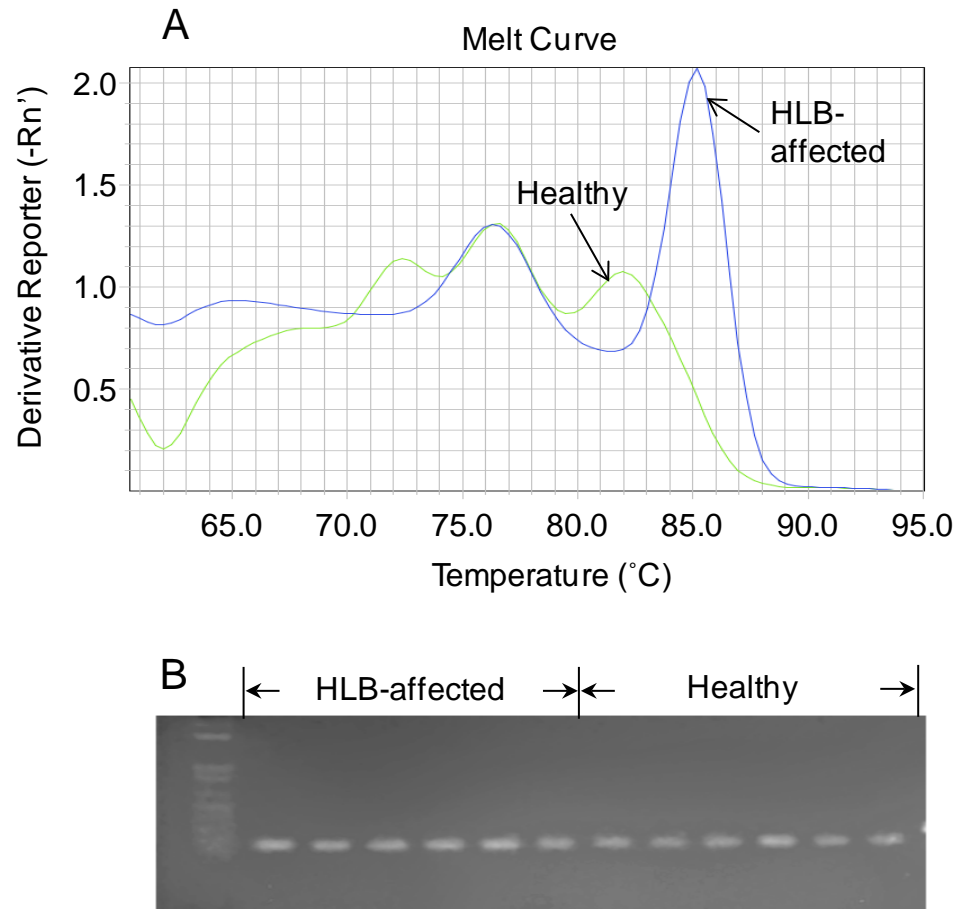

Fig. S1 Melt curves for PCR products from healthy (CLas negative) and HLB-affected (CLas positive) orange juice by a set of universal fungal primers (A); and 1.5% agarose gel image of the PCR products (B). (CLas=*Candidatus Liberibacter asiaticus*, HLB=huanglongbing)

Fig. S2

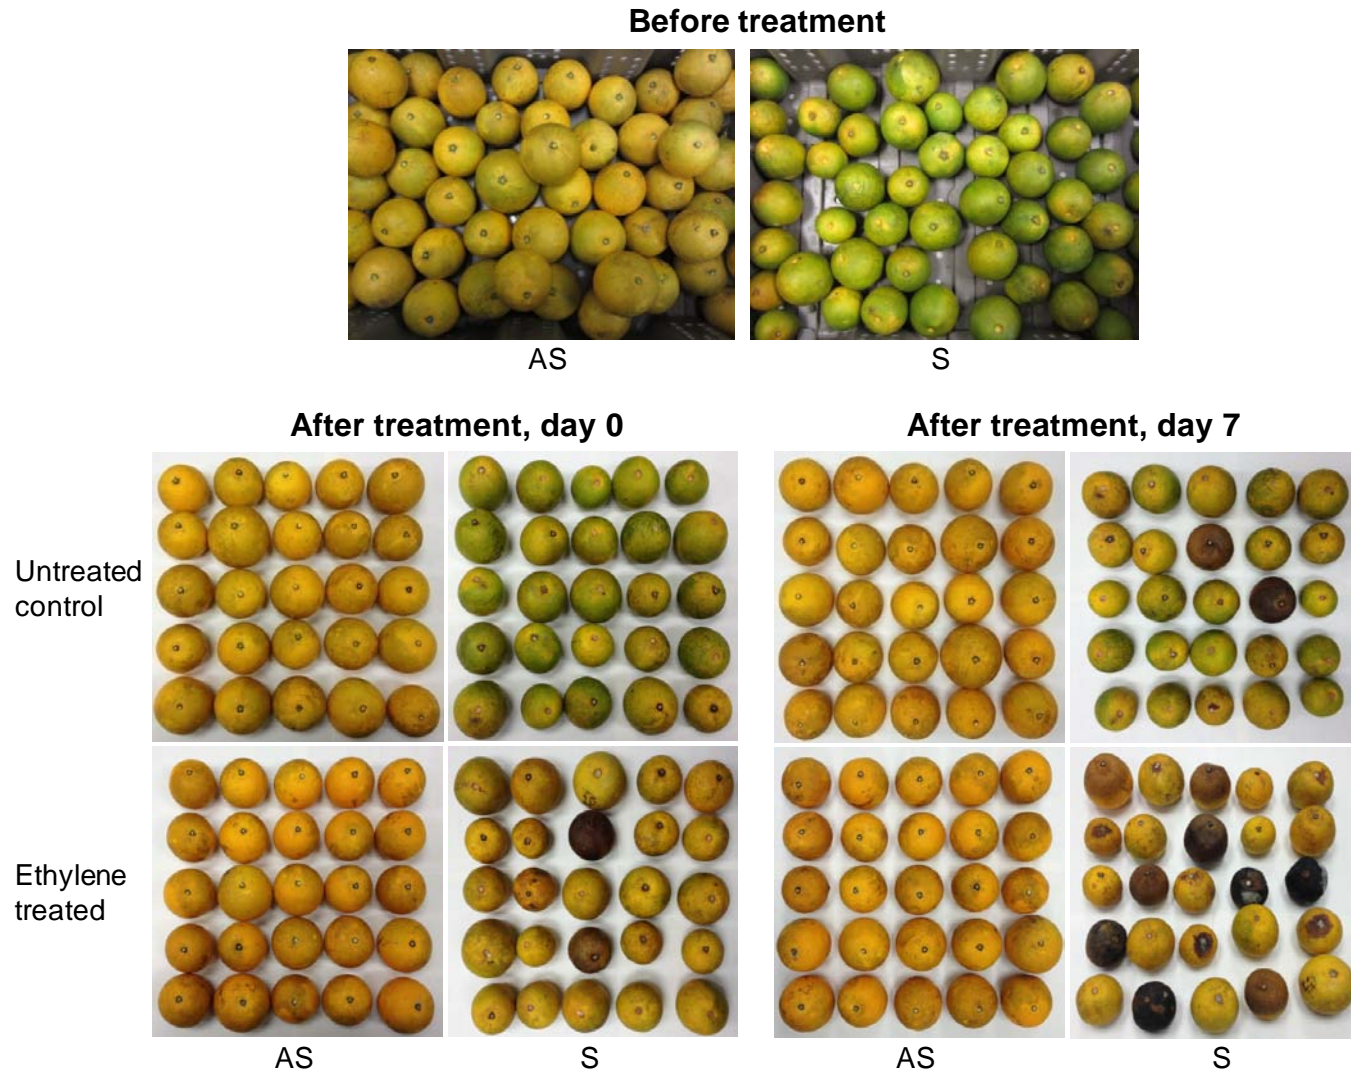

Fig.S2 One of the batches of Hamlin fruit used in the decay assay (AS=asymptomatic, S=huanglongbing-symptomatic)

Fig.S3

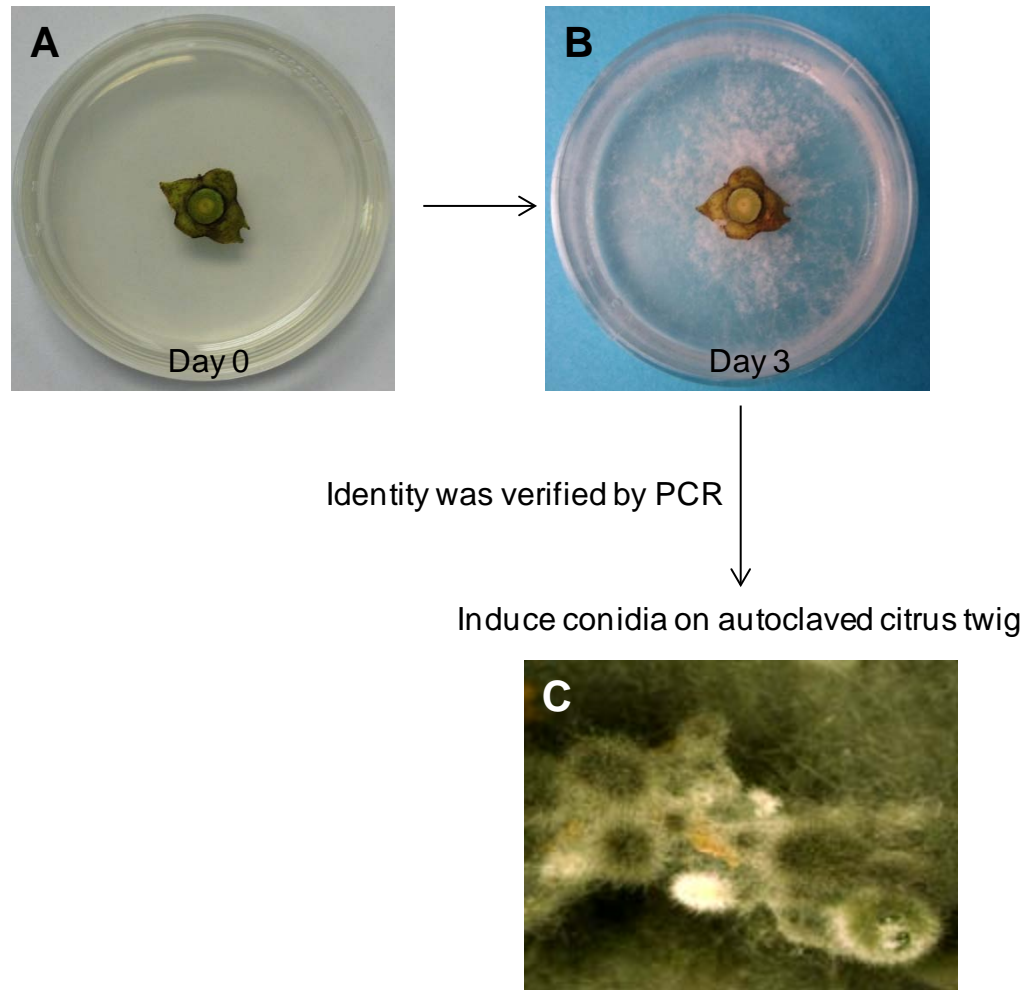

Fig.S3. Isolation of *Diplodia* from plant calyx abscission zone (AZ-C) on potato-dextrose agar media (A and B); Sub-culture of *Diplodia* on autoclaved citrus twigs (C).

Fig. S4

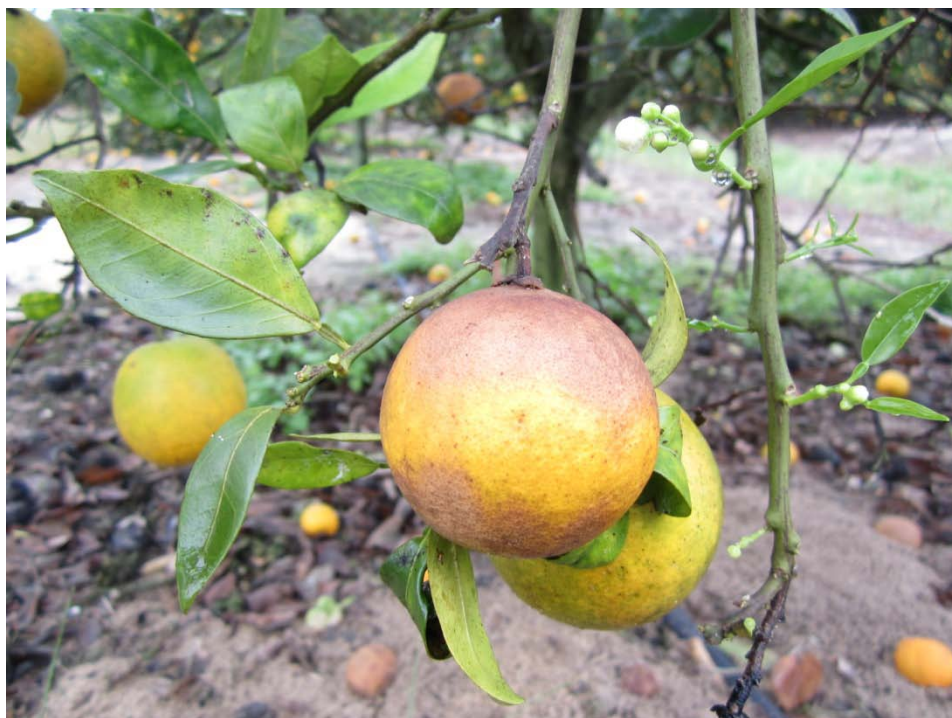

Fig. S4. Pre-harvest stem-end rot occurred on fruit attached to a huanglongbing-symptomatic tree.

Table S1 Sequences amplified from 6 HLB (CLas positive) and 6 healthy (CLas negative) juice samples. The highlighted 4 samples are those from which the *Diplodia* was identified with 100% identity; the DNA sequences highlighted in red are the universal fungal primer sequences (CLas = *Candidatus Liberibacter asiaticus*).

| OJ        | sequence cloned                                                                                                                                               | top match in gene bank                                                              | identity | accession #                               | priming miss match (nt) |
|-----------|---------------------------------------------------------------------------------------------------------------------------------------------------------------|-------------------------------------------------------------------------------------|----------|-------------------------------------------|-------------------------|
| HLB-1     | CTCGTAGTTGAACCTTGGCCTGGCTGGCCGGTCTGCCTCACCGCATGTACTGGTTCGGCCGGGTCTTCTCCTGCGGATCCGCATGCCCTTCACTGGGTGTGTTGGGAACCAGGACTTTTACTTTGAAAAAATTAGAGTGTTCAAAGCAGGC       | <i>Botryosphaeria rhodina</i> ,<br><i>Lasiodiplodia theobromae</i><br>18S rRNA gene | 100%     | U42476.1, EU673195.1,<br>KC442314.1, etc. | 0                       |
| HLB-2     | CTCGTAGTTGAACCTTGGCCTGGCTGGCCGGTCTGCCTCACCGCATGTACTGGTTCGGCCGGGTCTTCTCCTGCGGATCCGCATGCCCTTCACTGGGTGTGTTGGGAACCAGGACTTTTACTTTGAAAAAATTAGAGTGTTCAAAGCAGGC       | <i>Botryosphaeria rhodina</i> ,<br><i>Lasiodiplodia theobromae</i><br>18S rRNA gene | 100%     | U42476.1, EU673195.1,<br>KC442314.1, etc. | 0                       |
| HLB-3     | CTCGTAGTTGAACCTTGGCCTGGCTGGCCGGTCTGCCTCACCGCATGTACTGGTTCGGCCGGGTCTTCTCCTGCGGATCCGCATGCCCTTCACTGGGTGTGTTGGGAACCAGGACTTTTACTTTGAAAAAATTAGAGTGTTCAAAGCAGGC       | <i>Botryosphaeria rhodina</i> ,<br><i>Lasiodiplodia theobromae</i><br>18S rRNA gene | 100%     | U42476.1, EU673195.1,<br>KC442314.1, etc. | 0                       |
| HLB-4     | CTCGTAGTTGAACCTTGGGACGAGGGTGCCGGTCCGCTTTTTCGAGTACTGCCACTCTCTCCACGACCGCTCCTTCTGAGTGGCCGAATTACTTTGAGTAAATGAGAGTGTTCAAAGCAGGC                                    | <i>Clavispora reshetovae?</i><br>(a soil yeast)<br>18S rRNA gene                    | 79%      | FN433522.1                                | 0                       |
| HLB-5     | CTCGTAGTTGAACCTTGGGTTGGGTCGGCCGGTCCGCCTCGCGGTGTGCA CCGGCCGTCTCGTCCCTTCTGCGGCGATGCGCTCCTGGCCTTAATTGGC CCGGTTCGTGCCACCGGCGCTGTTACTTTGAAGAAATTAGAGTGTTCAAAGCAGGC | <i>Citrus maxima</i><br>18S rRNA gene                                               | 99%      | FJ866629.1                                | 2                       |
| HLB-6     | CTCGTAGTTGAACCTTGGCCTGGCTGGCCGGTCTGCCTCACCGCATGTACTGGTTCGGCCGGGTCTTCTCCTGCGGATCCGCATGCCCTTCACTGGGTGTGTTGGGAACCAGGACTTTTACTTTGAAAAAATTAGAGTGTTCAAAGCAGGC       | <i>Botryosphaeria rhodina</i> ,<br><i>Lasiodiplodia theobromae</i><br>18S rRNA gene | 100%     | U42476.1, EU673195.1,<br>KC442314.1, etc. | 0                       |
| Healthy-1 | CTCGTAGTTGAACCTTGGGTTGGGTCGGCCGGTCCGCCTCGCGGTGTGCA CCGGCCGTCTCGTCCCTTCTGCGGCGATGCGCTCCTGGCCTTAATTGGC CCGGTTCGTGCCACCGGCGCTGTTACTTTGAAGAAATTAGAGTGTTCAAAGCAGGC | <i>Citrus maxima</i><br>18S rRNA gene                                               | 99%      | FJ866629.1                                | 2                       |
| Healthy-2 | CTCGTAGTTGAACCTTGGGTTGGGTCGGCCGGTCCGCCTCGCGGTGTGCA CCGGCCGTCTCGTCCCTTCTGCGGCGATGCGCTCCTGGCCTTAATTGGC CCGGTTCGTGCCACCGGCGCTGTTACTTTGAAGAAATTAGAGTGTTCAAAGCAGGC | <i>Citrus maxima</i><br>18S rRNA gene                                               | 99%      | FJ866629.1                                | 2                       |
| Healthy-3 | CTCGTAGTTGAACCTTGGGTTGGGTCGGCCGGTCCGCCTCGCGGTGTGCA CCGGCCGTCTCGTCCCTTCTGCGGCGATGCGCTCCTGGCCTTAATTGGC CCGGTTCGTGCCACCGGCGCTGTTACTTTGAAGAAATTAGAGTGTTCAAAGCAGGC | <i>Citrus maxima</i><br>18S rRNA gene                                               | 99%      | FJ866629.1                                | 2                       |
| Healthy-4 | CTCGTAGTTGAACCTTGGGTTGGGTCGGCCGGTCCGCCTCGCGGTGTGCA CCGGCCGTCTCGTCCCTTCTGCGGCGATGCGCTCCTGGCCTTAATTGGC CCGGTTCGTGCCACCGGCGCTGTTACTTTGAAGAAATTAGAGTGTTCAAAGCAGGC | <i>Citrus maxima</i><br>18S rRNA gene                                               | 99%      | FJ866629.1                                | 2                       |
| Healthy-5 | CTCGTAGTTGAACCTTGGGTTGGGTCGGCCGGTCCGCCTCGCGGTGTGCA CCGGCCGTCTCGTCCCTTCTGCGGCGATGCGCTCCTGGCCTTAATTGGC CCGGTTCGTGCCACCGGCGCTGTTACTTTGAAGAAATTAGAGTGTTCAAAGCAGGC | <i>Poncirus trifoliata</i> ,<br>and a uncultured fungus<br>18S rRNA gene            | 99%      | AF206997.1,<br>JQ350757.1                 | 2                       |
| Healthy-6 | CTCGTAGTTGAACCTTGGGTTGGGTCGGCCGGTCCGCCTCGCGGTGTGCA CCGGCCGTCTCGTCCCTTCTGCGGCGATGCGCTCCTGGCCTTAATTGGC CCGGTTCGTGCCACCGGCGCTGTTACTTTGAAGAAATTAGAGTGTTCAAAGCAGGC | <i>Poncirus trifoliata</i> ,<br>and a uncultured fungus<br>18S rRNA gene            | 99%      | AF206997.1,<br>JQ350757.1                 | 2                       |
